# Supplementary material
Source: publisher figshare collection journal article supplement (https://brill.figshare.com/articles/dataset/_/1558240)
Supplement: Supplementary file 1 [file 1]

## Sheet: ABOUT THIS FILE
	The data presented in this file is discussed in a paper entitled "Haptic and Tactile Adjectives Are Consistently Mapped onto Color Space" Yasmina Jraissati, Nadiya Slobodenyuk, Ali Kanso, Lama Ghanem, and Imad Elhajj Correspondence concerning this article should be addressed to Yasmina Jraissati, Department of Philosophy, American University of Beirut, P.O.Box 11-0236, Riad El-Solh / Beirut 1107 …

## Sheet: MUNSELL COORDINATES
					0		1	3	5	7	9	11	13	15	17	19	21	23	25	27	29	31	33	35	37	39
		Wh		A	10
				B	9		2	2	2	2	4	6	6	2	2	2	2	2	2	2	2	2	2	2	2	2
				C	8		6	6	6	8	16	12	12	10	8	6	6	4	4	4	6	4	4	6	6	6
				D	7		8	10	10	14	12	12	12	10	10	8	8	6	6	6	8	6	6	8	10	8
				E	6		12	12	16	12	10	10	10	12	10	10	8	8	8	8	10	8	8	10	10	12
				F	5		14	14	14	10	8	8	8	10	12	10	10	8	8	8	12	10	10	10	12	14
				G	4		14	14	10	8	6	6	6	8	10	10	8	8	6	8	10	12	10	10	10	10
				H	3		10	12	8	6	4	4	4	6	8	10	6	6	6	6	10	12	10	10	10	10
				I	2		8	8	4	4	2	2	2	4	4	6	4	4	4	6	6	10	8	6	8	8
		Bk		J	0
							2.5	7.5	2.5	7.5	2.5	7.5	2.5	7.5	2.5	7.5	2.5	7.5	2.5	7.5	2.5	7.5	2.5	7.5	2.5	7.5
							R	R	YR	YR	Y	Y	GY	GY	G	G	BG	BG	B	B	BP	BP	P	P	RP	RP
		Above, the Munsell array: Value on the y axis, hue on the x axis, and in the array, saturation values.
		Only hues selected in this study are included.
		Below, the Munsell array with color samples, as an illustration.

## Sheet: SMOOTH-ROUGH
	SMOOTH
				0		1	3	5	7	9	11	13	15	17	19	21	23	25	27	29	31	33	35	37	39		65-100
		Wh	A	50																							50-65
			B	0		62.7	0	50.8	0	25.4	0	20.3	0	32.8	0	42.4	0	52.5	0	39	0	50	0	55.9	0		30-50
			C	0		0	47.5	0	35.6	0	18.6	0	39	0	39.7	0	51.7	0	47.5	0	52.5	0	54.2	0	54.2		20-30%
			D	31		0	0	0	0	0	0	0	0	0	0	0	0	0	0	0	0	0	0	0	0
			E	0		39	0	22	0	10.3	0	15.3	0	19	0	32.2	0	52.5	0	49.2	0	49.2	0	54.4	0
			F	0		0	29.3	0	10.2	0	11.9	0	23.7	0	37.9	0	37.3	0	45.6	0	49.2	0	45.8	0	48.3
			G	12.1		0	0	0	0	0	0	0	0	0	0	0	0	0	0	0	0	0	0	0	0
			H	0		35.6	0	10.3	0	10.2	0	11.9	0	11.9	0	33.9	0	32.8	0	28.8	0	32.2	0	35.6	0
			I	0		0	24.1	0	10.3	0	8.5	0	16.9	0	13.8	0	30.5	0	27.1	0	28.8	0	22	0	33.9
		Bk	J	20.3
						2.5	7.5	2.5	7.5	2.5	7.5	2.5	7.5	2.5	7.5	2.5	7.5	2.5	7.5	2.5	7.5	2.5	7.5	2.5	7.5
						R	R	YR	YR	Y	Y	GY	GY	G	G	BG	BG	B	B	BP	BP	P	P	RP	RP
	ROUGH
				0		1	3	5	7	9	11	13	15	17	19	21	23	25	27	29	31	33	35	37	39
		Wh	A	5.2
			B	0		5.1	0	11.9	0	27.1	0	22	0	6.9	0	5.1	0	1.7	0	5.1	0	6.9	0	3.4	0
			C	0		0	6.8	0	11.9	0	25.4	0	8.5	0	6.9	0	1.7	0	6.8	0	1.7	0	3.4	0	1.7
			D	19		0	0	0	0	0	0	0	0	0	0	0	0	0	0	0	0	0	0	0	0
			E	0		10.2	0	23.7	0	39.7	0	30.5	0	34.5	0	20.3	0	3.4	0	3.4	0	5.1	0	5.3	0
			F	0		0	12.1	0	35.6	0	39	0	28.8	0	6.9	0	3.4	0	0	0	3.4	0	8.5	0	6.9
			G	41.4		0	0	0	0	0	0	0	0	0	0	0	0	0	0	0	0	0	0	0	0
			H	0		18.6	0	39.7	0	44.1	0	44.1	0	40.7	0	13.6	0	15.5	0	13.6	0	10.2	0	13.6	0
			I	0		0	25.9	0	55.2	0	55.9	0	35.6	0	34.5	0	28.8	0	15.3	0	13.6	0	30.5	0	11.9
		Bk	J	40.7
						2.5	7.5	2.5	7.5	2.5	7.5	2.5	7.5	2.5	7.5	2.5	7.5	2.5	7.5	2.5	7.5	2.5	7.5	2.5	7.5
						R	R	YR	YR	Y	Y	GY	GY	G	G	BG	BG	B	B	BP	BP	P	P	RP	RP

## Sheet: SOFT-HARD
	SOFT
				0		1	3	5	7	9	11	13	15	17	19	21	23	25	27	29	31	33	35	37	39		65-100
		Wh	A	53.4																							50-65
			B	0		72.9	0	61	0	25.4	0	25.4	0	43.1	0	45.8	0	55.9	0	57.6	0	67.2	0	74.6	0		30-50
			C	0		0	52.5	0	27.1	0	18.6	0	32.2	0	37.9	0	55.2	0	50.8	0	52.5	0	78	0	69.5		20-30%
			D	31		0	0	0	0	0	0	0	0	0	0	0	0	0	0	0	0	0	0	0	0
			E	0		42.4	0	23.7	0	6.9	0	16.9	0	24.1	0	28.8	0	37.3	0	39	0	52.5	0	50.9	0
			F	0		0	29.3	0	11.9	0	15.3	0	23.7	0	32.8	0	39	0	43.9	0	59.3	0	45.8	0	58.6
			G	10.3		0	0	0	0	0	0	0	0	0	0	0	0	0	0	0	0	0	0	0	0
			H	0		33.9	0	5.2	0	8.5	0	11.9	0	15.3	0	28.8	0	31	0	35.6	0	32.2	0	44.1	0
			I	0		0	25.9	0	3.4	0	11.9	0	11.9	0	10.3	0	20.3	0	32.2	0	23.7	0	27.1	0	35.6
		Bk	J	13.6
						2.5	7.5	2.5	7.5	2.5	7.5	2.5	7.5	2.5	7.5	2.5	7.5	2.5	7.5	2.5	7.5	2.5	7.5	2.5	7.5
						R	R	YR	YR	Y	Y	GY	GY	G	G	BG	BG	B	B	BP	BP	P	P	RP	RP
	HARD
				0		1	3	5	7	9	11	13	15	17	19	21	23	25	27	29	31	33	35	37	39
		Wh	A	12.1
			B	0		6.8	0	5.1	0	22	0	20.3	0	12.1	0	11.9	0	8.5	0	3.4	0	3.4	0	5.1	0
			C	0		0	10.2	0	20.3	0	18.6	0	10.2	0	13.8	0	3.4	0	6.8	0	3.4	0	6.8	0	6.8
			D	27.6		0	0	0	0	0	0	0	0	0	0	0	0	0	0	0	0	0	0	0	0
			E	0		15.3	0	35.6	0	36.2	0	32.2	0	25.9	0	27.1	0	6.8	0	7	0	8.5	0	12.3	0
			F	0		0	19	0	28.8	0	40.7	0	22	0	15.5	0	6.8	0	15.8	0	5.1	0	16.9	0	17.2
			G	39.7		0	0	0	0	0	0	0	0	0	0	0	0	0	0	0	0	0	0	0	0
			H	0		23.7	0	41.4	0	42.4	0	42.4	0	33.9	0	20.3	0	25.9	0	25.4	0	18.6	0	22	0
			I	0		0	29.3	0	48.3	0	69.5	0	45.8	0	44.8	0	39	0	25.4	0	37.3	0	32.2	0	22
		Bk	J	67.8
						2.5	7.5	2.5	7.5	2.5	7.5	2.5	7.5	2.5	7.5	2.5	7.5	2.5	7.5	2.5	7.5	2.5	7.5	2.5	7.5
						R	R	YR	YR	Y	Y	GY	GY	G	G	BG	BG	B	B	BP	BP	P	P	RP	RP

## Sheet: LIGHT-HEAVY
	LIGHT
				0		1	3	5	7	9	11	13	15	17	19	21	23	25	27	29	31	33	35	37	39		65-100
		Wh	A	62.1																							50-65
			B	0		69.5	0	71.2	0	30.5	0	20.3	0	37.9	0	42.4	0	52.5	0	57.6	0	63.8	0	71.2	0		30-50
			C	0		0	42.4	0	15.3	0	16.9	0	37.3	0	46.6	0	56.9	0	57.6	0	49.2	0	66.1	0	59.3		20-30%
			D	39.7		0	0	0	0	0	0	0	0	0	0	0	0	0	0	0	0	0	0	0	0
			E	0		45.8	0	11.9	0	17.2	0	18.6	0	24.1	0	30.5	0	39	0	44.1	0	50.8	0	54.4	0
			F	0		0	32.8	0	6.8	0	6.8	0	27.1	0	43.1	0	27.1	0	47.4	0	40.7	0	30.5	0	36.2
			G	12.1		0	0	0	0	0	0	0	0	0	0	0	0	0	0	0	0	0	0	0	0
			H	0		8.5	0	5.2	0	5.1	0	3.4	0	13.6	0	37.3	0	12.1	0	11.9	0	11.9	0	22	0
			I	0		0	3.4	0	1.7	0	5.1	0	6.8	0	3.4	0	8.5	0	10.2	0	5.1	0	11.9	0	6.8
		Bk	J	8.5
						2.5	7.5	2.5	7.5	2.5	7.5	2.5	7.5	2.5	7.5	2.5	7.5	2.5	7.5	2.5	7.5	2.5	7.5	2.5	7.5
						R	R	YR	YR	Y	Y	GY	GY	G	G	BG	BG	B	B	BP	BP	P	P	RP	RP
	HEAVY
				0		1	3	5	7	9	11	13	15	17	19	21	23	25	27	29	31	33	35	37	39
		Wh	A	6.9
			B	0		1.7	0	3.4	0	37.3	0	40.7	0	15.5	0	22	0	13.6	0	6.8	0	3.4	0	3.4	0
			C	0		0	11.9	0	32.2	0	42.4	0	15.3	0	12.1	0	12.1	0	8.5	0	3.4	0	5.1	0	8.5
			D	24.1		0	0	0	0	0	0	0	0	0	0	0	0	0	0	0	0	0	0	0	0
			E	0		20.3	0	52.5	0	48.3	0	39	0	39.7	0	27.1	0	22	0	16.9	0	16.9	0	12.3	0
			F	0		0	37.9	0	59.3	0	50.8	0	30.5	0	12.1	0	33.9	0	15.8	0	15.3	0	32.2	0	22.4
			G	58.6		0	0	0	0	0	0	0	0	0	0	0	0	0	0	0	0	0	0	0	0
			H	0		55.9	0	65.5	0	59.3	0	52.5	0	62.7	0	27.1	0	50	0	49.2	0	49.2	0	47.5	0
			I	0		0	60.3	0	63.8	0	76.3	0	57.6	0	69	0	59.3	0	52.5	0	67.8	0	57.6	0	55.9
		Bk	J	66.1
						2.5	7.5	2.5	7.5	2.5	7.5	2.5	7.5	2.5	7.5	2.5	7.5	2.5	7.5	2.5	7.5	2.5	7.5	2.5	7.5
						R	R	YR	YR	Y	Y	GY	GY	G	G	BG	BG	B	B	BP	BP	P	P	RP	RP

## Sheet: WARM-COLD
	WARM
				0		1	3	5	7	9	11	13	15	17	19	21	23	25	27	29	31	33	35	37	39		65-100
		Wh	A	13.8																							50-65
			B	0		27.1	0	35.6	0	59.3	0	32.2	0	8.6	0	11.9	0	10.2	0	15.3	0	24.1	0	28.8	0		30-50
			C	0		0	55.9	0	57.6	0	64.4	0	11.9	0	10.3	0	6.9	0	10.2	0	13.6	0	33.9	0	37.3		20-30%
			D	22.4		0	0	0	0	0	0	0	0	0	0	0	0	0	0	0	0	0	0	0	0
			E	0		37.3	0	59.3	0	37.9	0	25.4	0	22.4	0	20.3	0	8.5	0	3.4	0	32.2	0	36.8	0
			F	0		0	48.3	0	50.8	0	27.1	0	32.2	0	10.3	0	28.8	0	10.5	0	8.5	0	35.6	0	41.4
			G	29.3		0	0	0	0	0	0	0	0	0	0	0	0	0	0	0	0	0	0	0	0
			H	0		67.8	0	63.8	0	32.2	0	30.5	0	22	0	22	0	24.1	0	20.3	0	32.2	0	42.4	0
			I	0		0	70.7	0	44.8	0	32.2	0	27.1	0	25.9	0	30.5	0	32.2	0	30.5	0	50.8	0	49.2
		Bk	J	33.9
						2.5	7.5	2.5	7.5	2.5	7.5	2.5	7.5	2.5	7.5	2.5	7.5	2.5	7.5	2.5	7.5	2.5	7.5	2.5	7.5
						R	R	YR	YR	Y	Y	GY	GY	G	G	BG	BG	B	B	BP	BP	P	P	RP	RP
	COLD
				0		1	3	5	7	9	11	13	15	17	19	21	23	25	27	29	31	33	35	37	39
		Wh	A	44.8
			B	0		28.8	0	20.3	0	16.9	0	23.7	0	51.7	0	69.5	0	74.6	0	59.3	0	32.8	0	32.2	0
			C	0		0	11.9	0	13.6	0	10.2	0	39	0	48.3	0	70.7	0	62.7	0	62.7	0	22	0	23.7
			D	29.3		0	0	0	0	0	0	0	0	0	0	0	0	0	0	0	0	0	0	0	0
			E	0		30.5	0	13.6	0	12.1	0	22	0	27.6	0	27.1	0	78	0	74.6	0	25.4	0	29.8	0
			F	0		0	22.4	0	13.6	0	10.2	0	20.3	0	36.2	0	45.8	0	61.4	0	52.5	0	23.7	0	24.1
			G	22.4		0	0	0	0	0	0	0	0	0	0	0	0	0	0	0	0	0	0	0	0
			H	0		5.1	0	10.3	0	15.3	0	20.3	0	22	0	28.8	0	46.6	0	54.2	0	25.4	0	16.9	0
			I	0		0	10.3	0	6.9	0	15.3	0	18.6	0	25.9	0	28.8	0	35.6	0	42.4	0	16.9	0	11.9
		Bk	J	23.7
						2.5	7.5	2.5	7.5	2.5	7.5	2.5	7.5	2.5	7.5	2.5	7.5	2.5	7.5	2.5	7.5	2.5	7.5	2.5	7.5
						R	R	YR	YR	Y	Y	GY	GY	G	G	BG	BG	B	B	BP	BP	P	P	RP	RP

## Sheet: DRY-HUMID
	DRY
				0		1	3	5	7	9	11	13	15	17	19	21	23	25	27	29	31	33	35	37	39		65-100
		Wh	A	17.2																							50-65
			B	0		23.7	0	30.5	0	33.9	0	27.1	0	13.8	0	6.8	0	13.6	0	15.3	0	19	0	8.5	0		30-50
			C	0		0	27.1	0	23.7	0	47.5	0	13.6	0	15.5	0	6.9	0	3.4	0	8.5	0	16.9	0	11.9		20-30%
			D	31		0	0	0	0	0	0	0	0	0	0	0	0	0	0	0	0	0	0	0	0
			E	0		13.6	0	20.3	0	31	0	20.3	0	15.5	0	18.6	0	3.4	0	1.7	0	8.5	0	8.8	0
			F	0		0	19	0	25.4	0	27.1	0	16.9	0	8.6	0	16.9	0	10.5	0	3.4	0	15.3	0	12.1
			G	41.4		0	0	0	0	0	0	0	0	0	0	0	0	0	0	0	0	0	0	0	0
			H	0		23.7	0	27.6	0	40.7	0	23.7	0	23.7	0	27.1	0	12.1	0	11.9	0	13.6	0	15.3	0
			I	0		0	25.9	0	32.8	0	47.5	0	20.3	0	25.9	0	27.1	0	13.6	0	8.5	0	23.7	0	18.6
		Bk	J	39
						2.5	7.5	2.5	7.5	2.5	7.5	2.5	7.5	2.5	7.5	2.5	7.5	2.5	7.5	2.5	7.5	2.5	7.5	2.5	7.5
						R	R	YR	YR	Y	Y	GY	GY	G	G	BG	BG	B	B	BP	BP	P	P	RP	RP
	HUMID
				0		1	3	5	7	9	11	13	15	17	19	21	23	25	27	29	31	33	35	37	39
		Wh	A	12.1
			B	0		22	0	18.6	0	13.6	0	18.6	0	32.8	0	47.5	0	49.2	0	32.2	0	22.4	0	30.5	0
			C	0		0	20.3	0	27.1	0	13.6	0	33.9	0	27.6	0	58.6	0	52.5	0	39	0	25.4	0	16.9
			D	10.3		0	0	0	0	0	0	0	0	0	0	0	0	0	0	0	0	0	0	0	0
			E	0		33.9	0	30.5	0	13.8	0	23.7	0	31	0	20.3	0	67.8	0	71.2	0	25.4	0	26.3	0
			F	0		0	24.1	0	22	0	23.7	0	33.9	0	34.5	0	33.9	0	45.6	0	45.8	0	18.6	0	29.3
			G	5.2		0	0	0	0	0	0	0	0	0	0	0	0	0	0	0	0	0	0	0	0
			H	0		28.8	0	15.5	0	23.7	0	20.3	0	23.7	0	22	0	41.4	0	42.4	0	23.7	0	25.4	0
			I	0		0	17.2	0	10.3	0	10.2	0	18.6	0	19	0	15.3	0	32.2	0	33.9	0	18.6	0	16.9
		Bk	J	3.4
						2.5	7.5	2.5	7.5	2.5	7.5	2.5	7.5	2.5	7.5	2.5	7.5	2.5	7.5	2.5	7.5	2.5	7.5	2.5	7.5
						R	R	YR	YR	Y	Y	GY	GY	G	G	BG	BG	B	B	BP	BP	P	P	RP	RP

## Sheet: VISCOUS-FLUID
	VISCOUS
				0		1	3	5	7	9	11	13	15	17	19	21	23	25	27	29	31	33	35	37	39		65-100
		Wh	A	10.3																							50-65
			B	0		20.3	0	22	0	35.6	0	47.5	0	24.1	0	22	0	13.6	0	13.6	0	10.3	0	13.6	0		30-50
			C	0		0	32.2	0	44.1	0	39	0	35.6	0	34.5	0	13.8	0	8.5	0	8.5	0	28.8	0	22		20-30%
			D	15.5		0	0	0	0	0	0	0	0	0	0	0	0	0	0	0	0	0	0	0	0
			E	0		20.3	0	37.3	0	39.7	0	44.1	0	32.8	0	40.7	0	8.5	0	6.8	0	25.4	0	22.8	0
			F	0		0	36.2	0	32.2	0	42.4	0	39	0	19	0	28.8	0	12.3	0	18.6	0	32.2	0	22.4
			G	27.6		0	0	0	0	0	0	0	0	0	0	0	0	0	0	0	0	0	0	0	0
			H	0		30.5	0	29.3	0	52.5	0	40.7	0	40.7	0	30.5	0	20.7	0	16.9	0	28.8	0	33.9	0
			I	0		0	32.8	0	39.7	0	35.6	0	37.3	0	36.2	0	39	0	20.3	0	28.8	0	40.7	0	35.6
		Bk	J	27.1
						2.5	7.5	2.5	7.5	2.5	7.5	2.5	7.5	2.5	7.5	2.5	7.5	2.5	7.5	2.5	7.5	2.5	7.5	2.5	7.5
						R	R	YR	YR	Y	Y	GY	GY	G	G	BG	BG	B	B	BP	BP	P	P	RP	RP
	FLUID
				0		1	3	5	7	9	11	13	15	17	19	21	23	25	27	29	31	33	35	37	39
		Wh	A	22.4
			B	0		32.2	0	25.4	0	16.9	0	11.9	0	25.9	0	40.7	0	57.6	0	47.5	0	31	0	32.2	0
			C	0		0	20.3	0	15.3	0	11.9	0	16.9	0	20.7	0	44.8	0	54.2	0	52.5	0	22	0	25.4
			D	15.5		0	0	0	0	0	0	0	0	0	0	0	0	0	0	0	0	0	0	0	0
			E	0		30.5	0	10.2	0	12.1	0	18.6	0	10.3	0	10.2	0	64.4	0	67.8	0	20.3	0	33.3	0
			F	0		0	19	0	11.9	0	11.9	0	6.8	0	22.4	0	33.9	0	56.1	0	44.1	0	16.9	0	22.4
			G	6.9		0	0	0	0	0	0	0	0	0	0	0	0	0	0	0	0	0	0	0	0
			H	0		25.4	0	20.7	0	6.8	0	8.5	0	6.8	0	10.2	0	39.7	0	45.8	0	11.9	0	13.6	0
			I	0		0	15.5	0	8.6	0	3.4	0	10.2	0	10.3	0	10.2	0	37.3	0	25.4	0	8.5	0	11.9
		Bk	J	10.2
						2.5	7.5	2.5	7.5	2.5	7.5	2.5	7.5	2.5	7.5	2.5	7.5	2.5	7.5	2.5	7.5	2.5	7.5	2.5	7.5
						R	R	YR	YR	Y	Y	GY	GY	G	G	BG	BG	B	B	BP	BP	P	P	RP	RP

## Sheet: THIN-THICK
	THIN
				0		1	3	5	7	9	11	13	15	17	19	21	23	25	27	29	31	33	35	37	39		65-100
		Wh	A	44.8																							50-65
			B	0		44.1	0	44.1	0	22	0	23.7	0	41.4	0	49.2	0	42.4	0	35.6	0	41.4	0	49.2	0		30-50
			C	0		0	28.8	0	11.9	0	11.9	0	30.5	0	37.9	0	39.7	0	33.9	0	39	0	42.4	0	42.4		20-30%
			D	27.6		0	0	0	0	0	0	0	0	0	0	0	0	0	0	0	0	0	0	0	0
			E	0		35.6	0	10.2	0	12.1	0	8.5	0	13.8	0	18.6	0	25.4	0	23.7	0	40.7	0	33.3	0
			F	0		0	17.2	0	8.5	0	3.4	0	13.6	0	25.9	0	20.3	0	24.6	0	22	0	23.7	0	20.7
			G	3.4		0	0	0	0	0	0	0	0	0	0	0	0	0	0	0	0	0	0	0	0
			H	0		10.2	0	1.7	0	1.7	0	1.7	0	8.5	0	11.9	0	12.1	0	13.6	0	8.5	0	10.2	0
			I	0		0	1.7	0	1.7	0	1.7	0	3.4	0	1.7	0	8.5	0	3.4	0	1.7	0	5.1	0	6.8
		Bk	J	3.4
						2.5	7.5	2.5	7.5	2.5	7.5	2.5	7.5	2.5	7.5	2.5	7.5	2.5	7.5	2.5	7.5	2.5	7.5	2.5	7.5
						R	R	YR	YR	Y	Y	GY	GY	G	G	BG	BG	B	B	BP	BP	P	P	RP	RP
	THICK
				0		1	3	5	7	9	11	13	15	17	19	21	23	25	27	29	31	33	35	37	39
		Wh	A	3.4
			B	0		5.1	0	11.9	0	28.8	0	23.7	0	13.8	0	6.8	0	5.1	0	5.1	0	3.4	0	3.4	0
			C	0		0	20.3	0	28.8	0	45.8	0	11.9	0	10.3	0	6.9	0	6.8	0	8.5	0	5.1	0	8.5
			D	12.1		0	0	0	0	0	0	0	0	0	0	0	0	0	0	0	0	0	0	0	0
			E	0		13.6	0	33.9	0	32.8	0	35.6	0	36.2	0	18.6	0	10.2	0	10.2	0	5.1	0	14	0
			F	0		0	29.3	0	35.6	0	42.4	0	30.5	0	17.2	0	23.7	0	17.5	0	18.6	0	23.7	0	20.7
			G	44.8		0	0	0	0	0	0	0	0	0	0	0	0	0	0	0	0	0	0	0	0
			H	0		37.3	0	43.1	0	47.5	0	42.4	0	42.4	0	32.2	0	29.3	0	40.7	0	42.5	0	39	0
			I	0		0	50	0	48.3	0	50.8	0	45.8	0	48.3	0	50.8	0	49.2	0	47.5	0	52.5	0	42.4
		Bk	J	54.2
						2.5	7.5	2.5	7.5	2.5	7.5	2.5	7.5	2.5	7.5	2.5	7.5	2.5	7.5	2.5	7.5	2.5	7.5	2.5	7.5
						R	R	YR	YR	Y	Y	GY	GY	G	G	BG	BG	B	B	BP	BP	P	P	RP	RP

## Sheet: SUPPLE-RIGID
	SUPPLE
				0		1	3	5	7	9	11	13	15	17	19	21	23	25	27	29	31	33	35	37	39		65-100
		Wh	A	24.1																							50-65
			B	0		44.1	0	39	0	18.6	0	20.3	0	32.8	0	40.7	0	37.3	0	32.2	0	29.3	0	44.1	0		30-50
			C	0		0	44.1	0	23.7	0	18.6	0	28.8	0	31	0	43.1	0	44.1	0	32.2	0	49.2	0	42.4		20-30%
			D	12.1		0	0	0	0	0	0	0	0	0	0	0	0	0	0	0	0	0	0	0	0
			E	0		33.9	0	16.9	0	15.5	0	18.6	0	25.9	0	25.4	0	33.9	0	40.7	0	32.2	0	45.6	0
			F	0		0	24.1	0	6.8	0	15.3	0	20.3	0	19	0	28.8	0	36.8	0	42.4	0	23.7	0	36.2
			G	8.6		0	0	0	0	0	0	0	0	0	0	0	0	0	0	0	0	0	0	0	0
			H	0		22	0	12.1	0	10.2	0	13.6	0	6.8	0	22	0	27.6	0	20.3	0	20.3	0	22	0
			I	0		0	8.6	0	6.9	0	8.5	0	6.8	0	8.6	0	10.2	0	27.1	0	16.9	0	13.6	0	23.7
		Bk	J	8.5
						2.5	7.5	2.5	7.5	2.5	7.5	2.5	7.5	2.5	7.5	2.5	7.5	2.5	7.5	2.5	7.5	2.5	7.5	2.5	7.5
						R	R	YR	YR	Y	Y	GY	GY	G	G	BG	BG	B	B	BP	BP	P	P	RP	RP
	RIGID
				0		1	3	5	7	9	11	13	15	17	19	21	23	25	27	29	31	33	35	37	39
		Wh	A	24.1
			B	0		8.5	0	11.9	0	27.1	0	16.9	0	10.3	0	11.9	0	10.2	0	8.5	0	12.1	0	3.4	0
			C	0		0	15.3	0	15.3	0	37.3	0	16.9	0	15.5	0	10.3	0	10.2	0	15.3	0	11.9	0	5.1
			D	32.8		0	0	0	0	0	0	0	0	0	0	0	0	0	0	0	0	0	0	0	0
			E	0		11.9	0	25.4	0	31	0	16.9	0	25.9	0	30.5	0	15.3	0	10.1	0	10.2	0	14	0
			F	0		0	13.8	0	33.9	0	40.7	0	25.4	0	20.7	0	16.9	0	8.8	0	8.5	0	25.4	0	17.2
			G	36.2		0	0	0	0	0	0	0	0	0	0	0	0	0	0	0	0	0	0	0	0
			H	0		23.7	0	34.5	0	40.7	0	28.8	0	39	0	11.9	0	27.6	0	27.1	0	22	0	15.3	0
			I	0		0	27.6	0	46.6	0	55.9	0	39	0	48.3	0	35.6	0	23.7	0	32.2	0	37.3	0	28.8
		Bk	J	50.8
						2.5	7.5	2.5	7.5	2.5	7.5	2.5	7.5	2.5	7.5	2.5	7.5	2.5	7.5	2.5	7.5	2.5	7.5	2.5	7.5
						R	R	YR	YR	Y	Y	GY	GY	G	G	BG	BG	B	B	BP	BP	P	P	RP	RP

[truncated: 3 more sheets: STICKY-NON STICKY, ELASTIC-STIFF, POINTY-ROUND]
